# Supplementary material for: Reconstruction of flow conditions from 2004 Indian Ocean tsunamideposits at the Phra Thong island using a deep neural networkinverse model
Source: Copernicus journal article supplement (doi:10.5194/nhess-2020-373), 2020-11-16
Supplement: Supplementary file [file nhess-2020-373-AC6-supplement.pdf]

| distance | 726      | 364      | 182      | 91       | 46       |
|----------|----------|----------|----------|----------|----------|
| 0        | 0.010399 | 0.029123 | 0.021142 | 0.006882 | 0.000455 |
| 51.41541 | 0.004638 | 0.010623 | 0.016518 | 0.01624  | 0.001981 |
| 101.5412 | 0.01909  | 0.033383 | 0.021191 | 0.015271 | 0.002038 |
| 132.8777 | 0.014846 | 0.036879 | 0.038916 | 0.028934 | 0.00338  |
| 178.3496 | 0.000897 | 0.004421 | 0.032821 | 0.048209 | 0.008753 |
| 235.2521 | 0.000248 | 0.00071  | 0.00996  | 0.015168 | 0.001914 |
| 267.1548 | 0.023041 | 0.013593 | 0.010173 | 0.017016 | 0.003069 |
| 296.4631 | 0.012222 | 0.011268 | 0.008694 | 0.012747 | 0.002035 |
| 344.9381 | 0.004596 | 0.009952 | 0.017344 | 0.020869 | 0.003623 |
| 414.1045 | 0.002789 | 0.004262 | 0.019079 | 0.031537 | 0.006802 |
| 458.8842 | 0.00045  | 0.000735 | 0.006082 | 0.009064 | 0.001527 |
| 491.7154 | 0.006784 | 0.018716 | 0.026314 | 0.023898 | 0.003289 |
| 525.9441 | 0.000312 | 0.00067  | 0.008444 | 0.013288 | 0.002287 |
| 607.6578 | 0.006453 | 0.015906 | 0.031496 | 0.038024 | 0.007074 |
| 673.2236 | 0.004498 | 0.011375 | 0.017926 | 0.019306 | 0.003352 |
| 751.9185 | 0.00239  | 0.005526 | 0.013929 | 0.014474 | 0.002017 |
| 807.2173 | 0.001888 | 0.00435  | 0.016767 | 0.024377 | 0.005193 |
| 868.3649 | 0.001695 | 0.005897 | 0.015554 | 0.017724 | 0.002917 |
| 956.0379 | 0.00281  | 0.009894 | 0.029122 | 0.034147 | 0.005493 |
| 1017.972 | 0.003594 | 0.009873 | 0.026584 | 0.032365 | 0.005828 |
| 1091.84  | 0.001516 | 0.003771 | 0.016798 | 0.024389 | 0.005023 |
| 1175.299 | 0.001224 | 0.001481 | 0.009721 | 0.01953  | 0.005333 |
| 1253.758 | 0.001143 | 0.001684 | 0.008231 | 0.014364 | 0.00333  |
| 1324.607 | 0.00114  | 0.001083 | 0.006477 | 0.013431 | 0.003911 |
| 1413.868 | 0.000597 | 0.001263 | 0.005764 | 0.009499 | 0.002394 |
| 1489.356 | 0.000723 | 0.001125 | 0.004054 | 0.008971 | 0.002817 |
| 1537.138 | 0.000691 | 0.000728 | 0.003361 | 0.006853 | 0.002003 |
| 1641.806 | 0.001587 | 0.001434 | 0.003044 | 0.005171 | 0.001253 |
| 1782.245 | 0.002549 | 0.004872 | 0.001523 | 0.001276 | 0.000657 |
